# Supplementary material for: Early Detection, Intervention and Prevention of Psychosis Program: Community Outreach and Early Identification at Six U.S. Sites
Source: Atypon-hosted journal article supplement (doi:10.1176/appi.ps.201300236), 2016-01-14

### ***Inclusion and Exclusion Criteria***

Community members and professionals were encouraged to refer young people between the ages of 12 and 25 living within the site catchment area and showing signs of positive symptoms of psychosis (20). All referrals were screened by telephone using a detailed phone screen assessment. If determined eligible for the treatment research study, they were then invited to complete the full baseline protocol and informed consent was obtained. Otherwise they were referred elsewhere. Inclusion in the study was based on in-depth interviews using the Structured Interview for Prodromal Syndromes (SIPS) (26). Risk-based allocation was used to assign cases to treatment or control conditions (the study design is described in detail previously (20, 29). Based on the level of attenuated psychotic symptoms from the SIPS, a young person at clinical high-risk was assigned to the treatment condition. Young people below that threshold were assigned to the control group.

# Community Mapping Tool

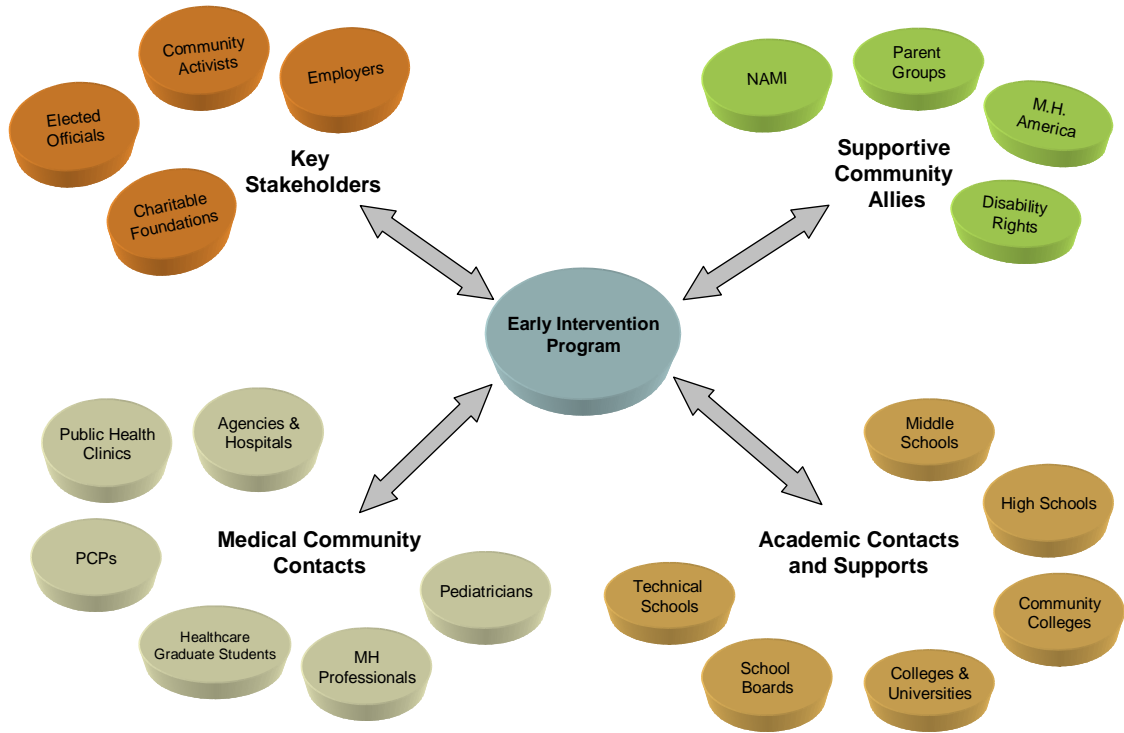

### Catchment Area, Outreach Activities and Referrals by Site

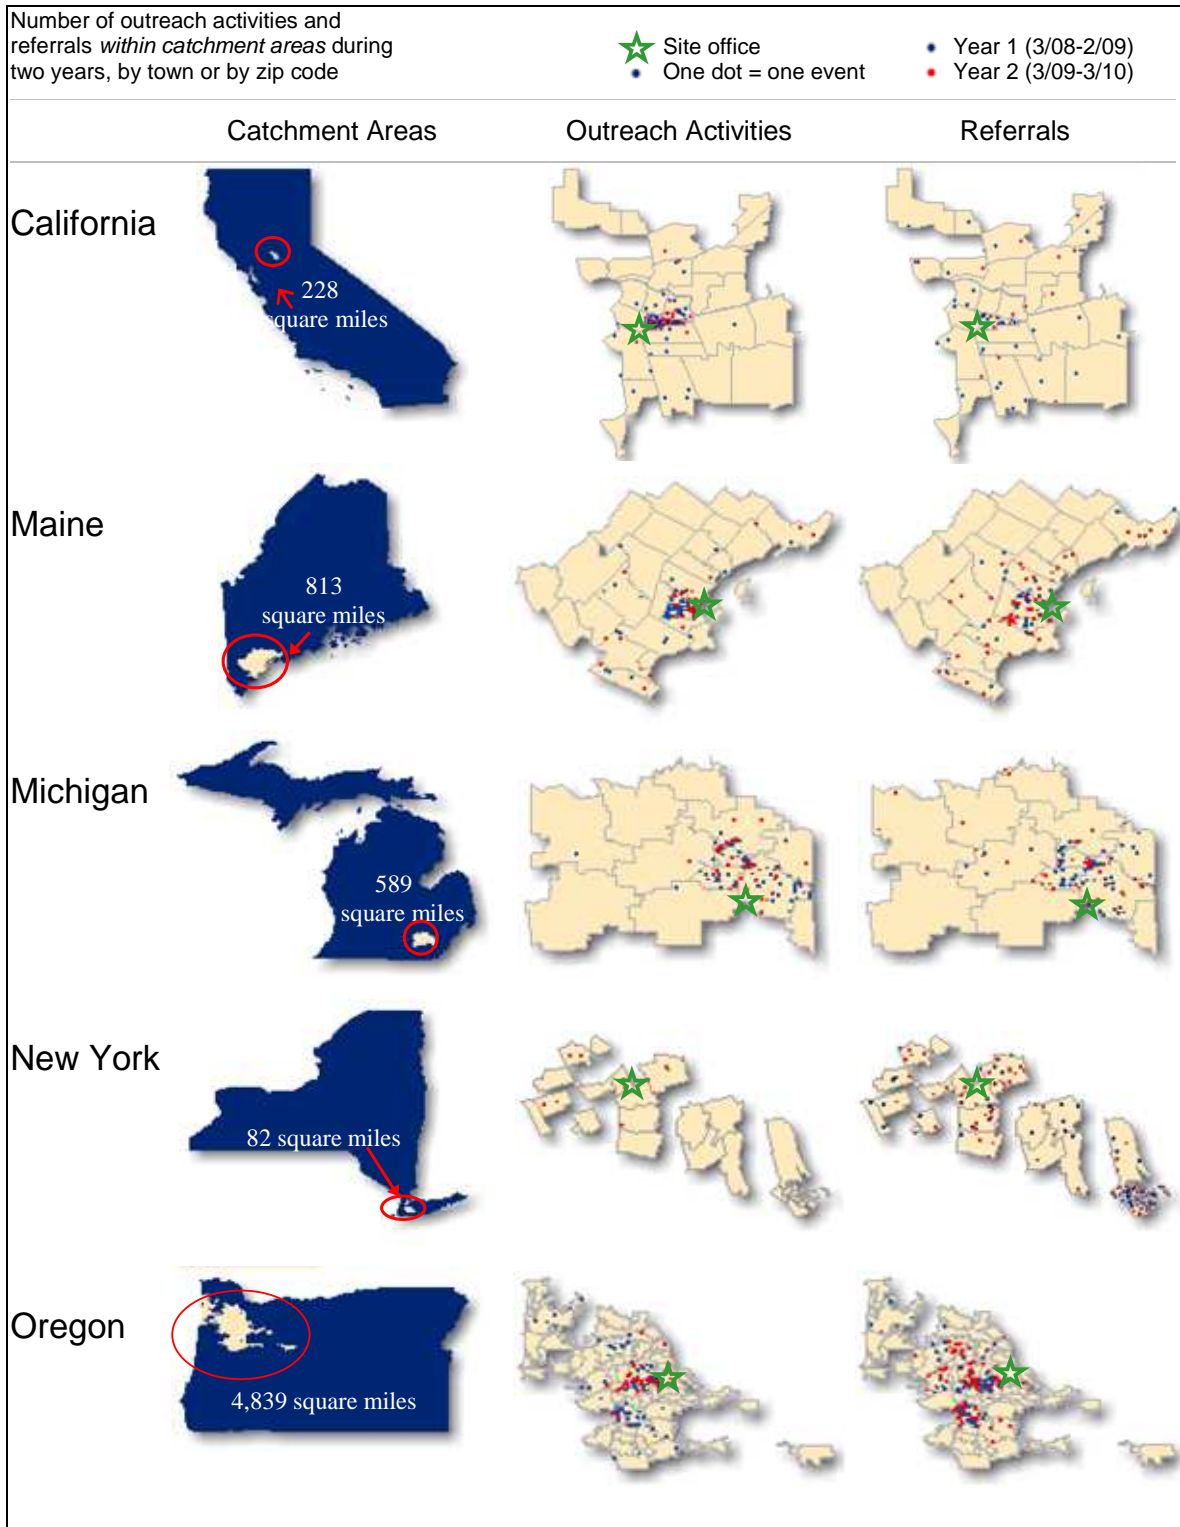

Supplement: appi.ps.201300236.ds001.pdf [file appi.ps.201300236.ds001.pdf]
